# Supplementary material for: Synthesis, Enantiomeric Resolution and Biological Evaluation of HIV Capsid Inhibition Activity for Racemic, (S)- and (R)-PF74
Source: MDPI journal article supplement (doi:10.3390/molecules26133919), 2021-06-26

## **Supplementary Material**

**Synthesis, Enantiomeric Resolution and Biological Evaluation of  
HIV Capsid Inhibition Activity for Racemic, (*S*)- and (*R*)-PF74.**

# <sup>1</sup>H NMR Spectra of methyl ester **3a**

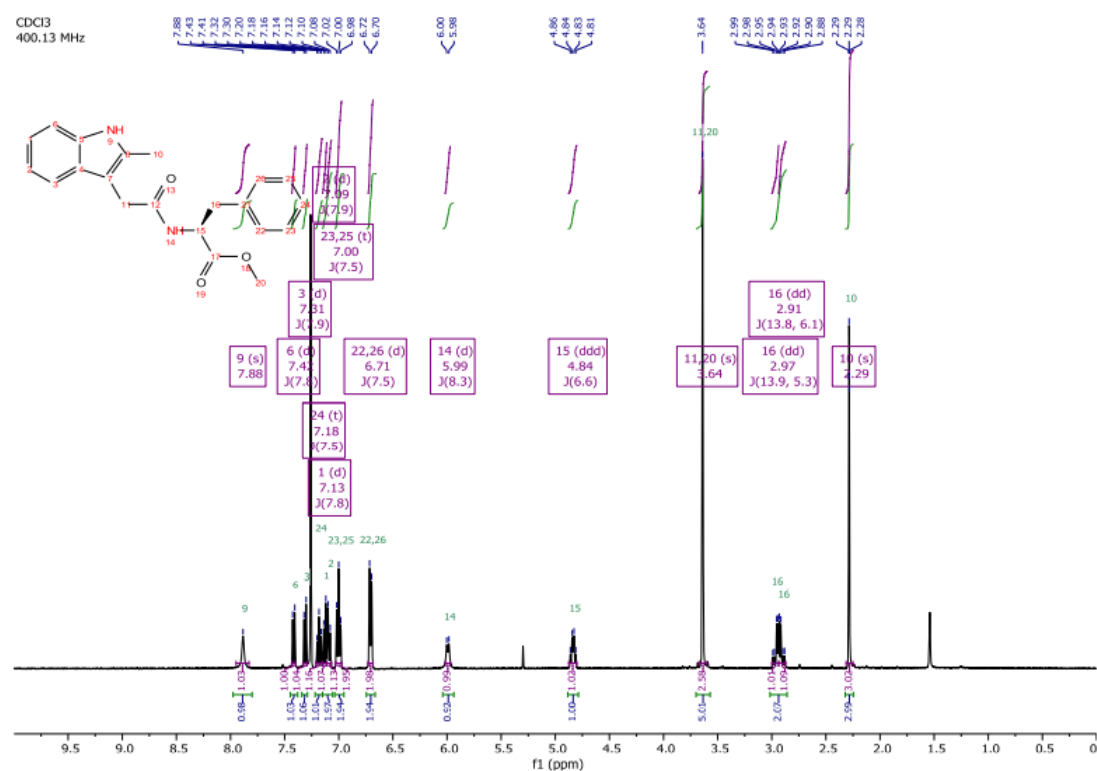

# <sup>13</sup>C NMR Spectra of methyl ester **3a**

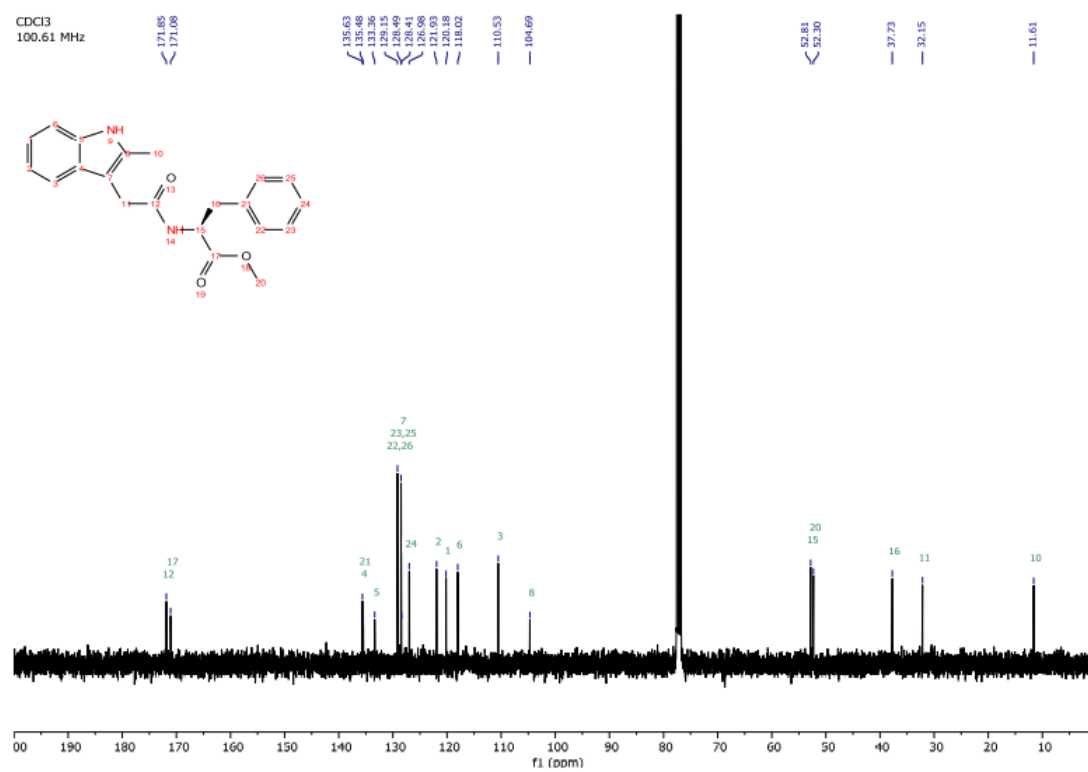

**Chemical Structure of Compound 10:**

O=C1C(=O)Nc2cc3ccccc3cc2N1C(=O)O

**<sup>1</sup>H NMR Spectrum (CDCl<sub>3</sub>):**

| Peak Label | Chemical Shift (ppm) | Integration |
|------------|----------------------|-------------|
| 9 (s)      | 7.92                 | 1.00        |
| 20 (t)     | 7.18                 | 1.00        |
| 18,22 (d)  | 6.70                 | 1.00        |
| 24 (d)     | 6.00                 | 1.00        |
| 14 (m)     | 4.84                 | 1.00        |
| 11',26 (s) | 3.64                 | 1.00        |
| 15' (m)    | 2.93                 | 1.00        |
| 19 (s)     | 2.28                 | 1.00        |

CDCl<sub>3</sub>  
100.62 MHz

171.85  
171.09

135.61  
135.47  
129.15  
128.49  
128.39  
128.00  
121.91  
120.17  
118.00

110.54  
104.65

52.81  
52.31

37.72  
32.14

11.60

The figure displays the <sup>13</sup>C NMR spectrum of compound 10 in CDCl<sub>3</sub>. The chemical structure of compound 10 is shown in the upper left, with carbon atoms numbered 1 through 26. The spectrum shows peaks corresponding to these carbons, with the following assignments: 12, 16 (aromatic); 17, 4, 5 (aliphatic); 7, 19, 21, 18, 22 (carbonyl); 20, 2, 1, 6 (aliphatic); 3, 8 (aliphatic); 14, 26 (aliphatic); 15, 11 (aliphatic); and 10 (aliphatic). The x-axis represents the chemical shift in ppm, ranging from 0 to 200. The solvent peak for CDCl<sub>3</sub> is visible at 77.0 ppm.

HSQC NMR Spectra of methyl ester **3b**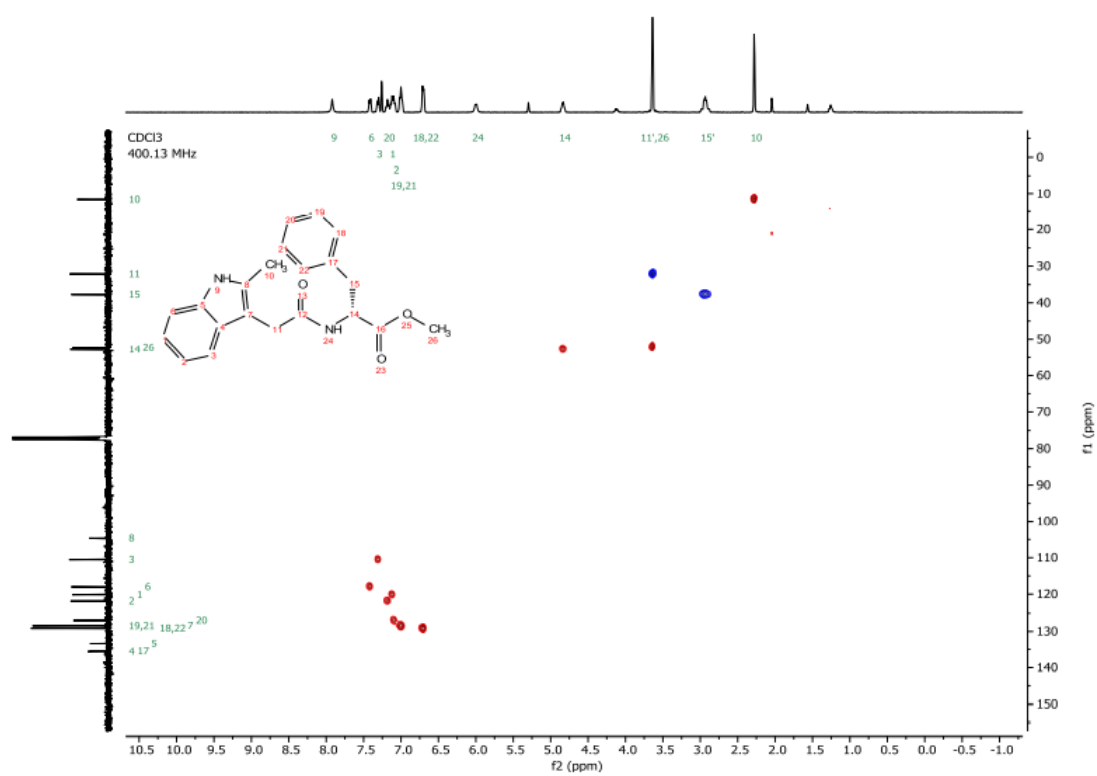

### <sup>1</sup>H NMR Spectra of methyl ester **3c**

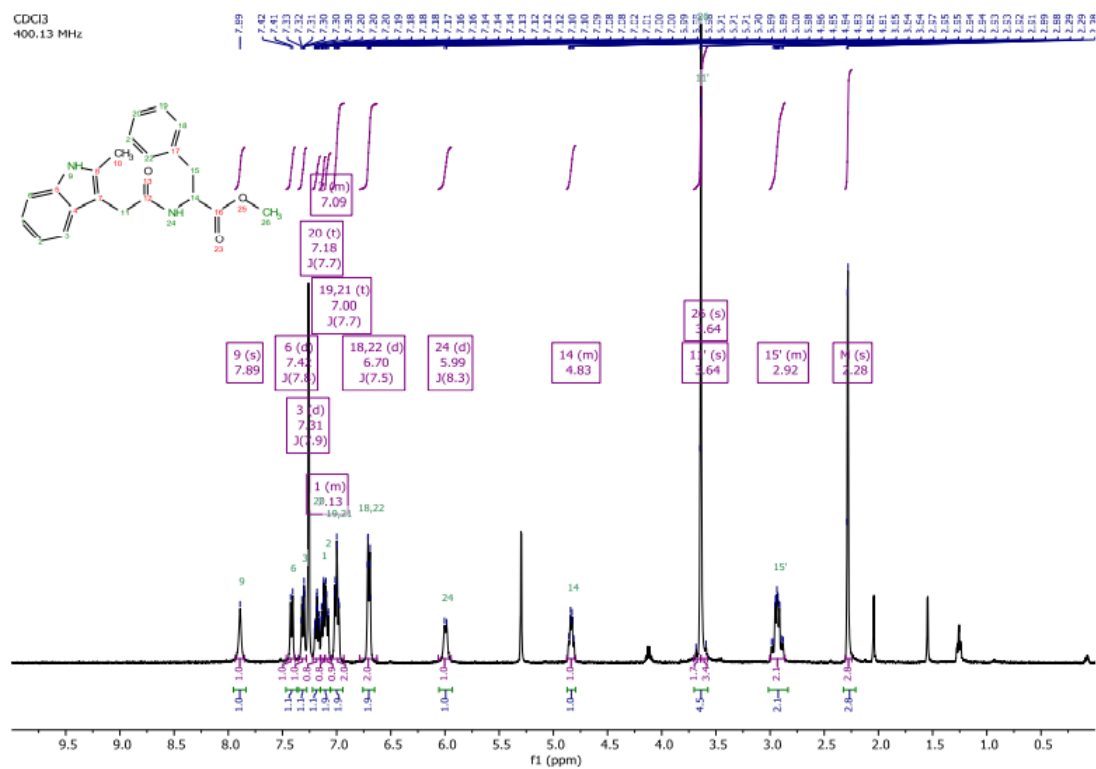

**1H NMR spectrum of compound 10 in CDCl<sub>3</sub>.**

**Chemical structure of compound 10:** O=C1C(=O)N(C1)c2cc3ccccc3nc2

**Peak list (ppm, integration, multiplicity):**

| Chemical Shift (ppm) | Integration | Multiplicity |
|----------------------|-------------|--------------|
| 8.14                 | 1.10        | s            |
| 7.34                 | 1.00        | d            |
| 7.26                 | 1.00        | d            |
| 7.25                 | 1.00        | d            |
| 7.15                 | 1.00        | d            |
| 7.11                 | 1.00        | d            |
| 7.07                 | 1.00        | d            |
| 7.01                 | 1.00        | d            |
| 6.98                 | 1.00        | d            |
| 6.96                 | 1.00        | d            |
| 6.75                 | 1.00        | d            |
| 6.16                 | 1.00        | d            |
| 4.76                 | 1.00        | dd           |
| 3.61                 | 1.00        | m            |
| 3.00                 | 1.00        | dd           |
| 2.89                 | 1.00        | dd           |
| 2.13                 | 3.00        | s            |

Chemical structure of compound **1** is shown with atom numbering. The <sup>13</sup>C NMR spectrum (CDCl<sub>3</sub>, 100.62 MHz) displays the following peak assignments (ppm):

- 14, 11, 4, 5, 20, 23, 2, 1, 6, 3, 8, 13, 16, 10, 18

The x-axis represents the chemical shift in ppm (f1), ranging from 0 to 200.

## COSY NMR Spectra of acid **4a**

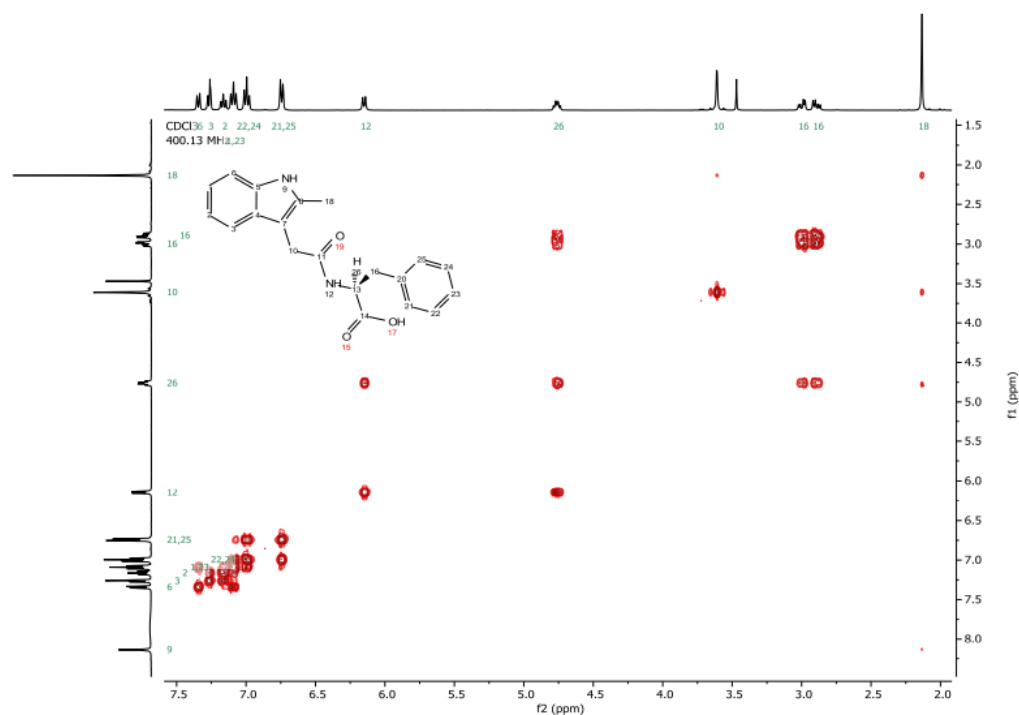

## DEPT-135 NMR Spectra of acid **4a**

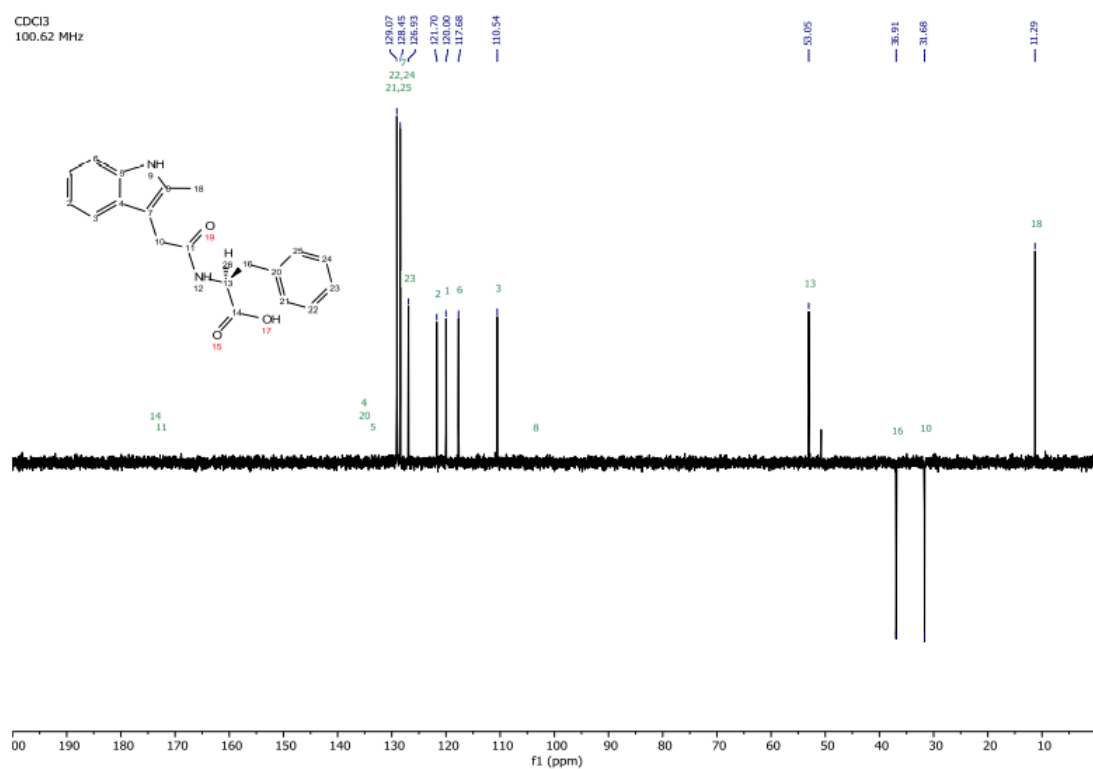

## HSQC NMR Spectra of acid **4a**

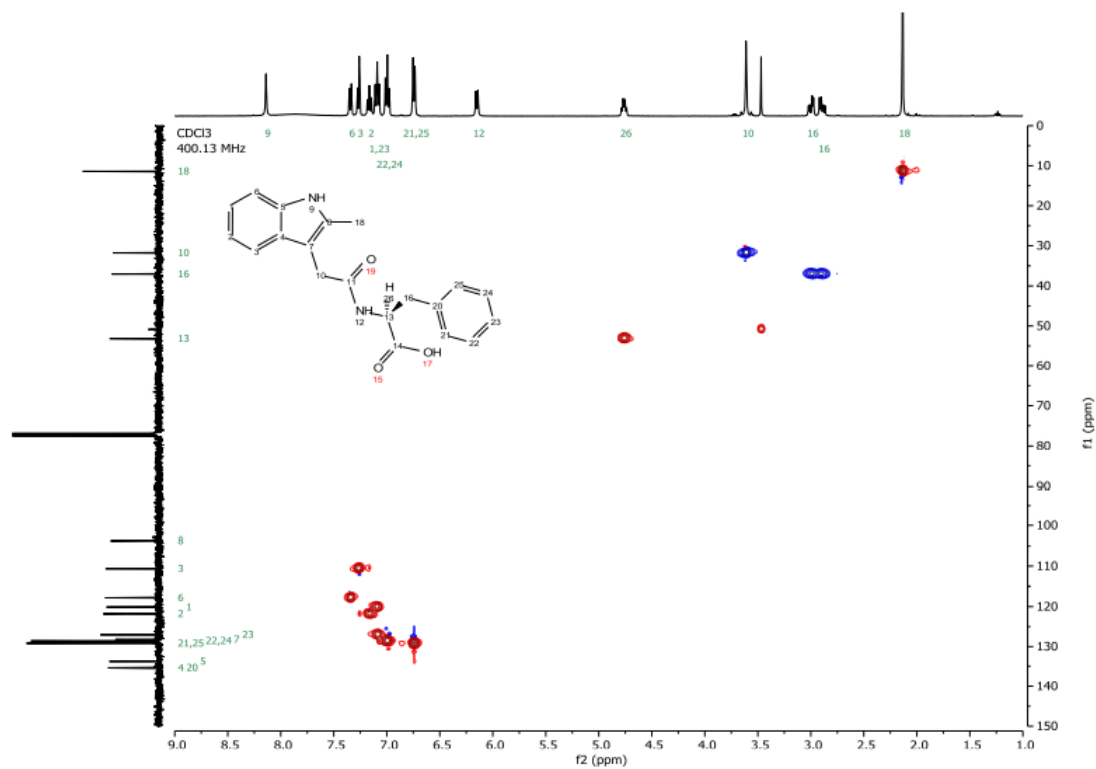

## HMBC NMR Spectra of acid **4a**

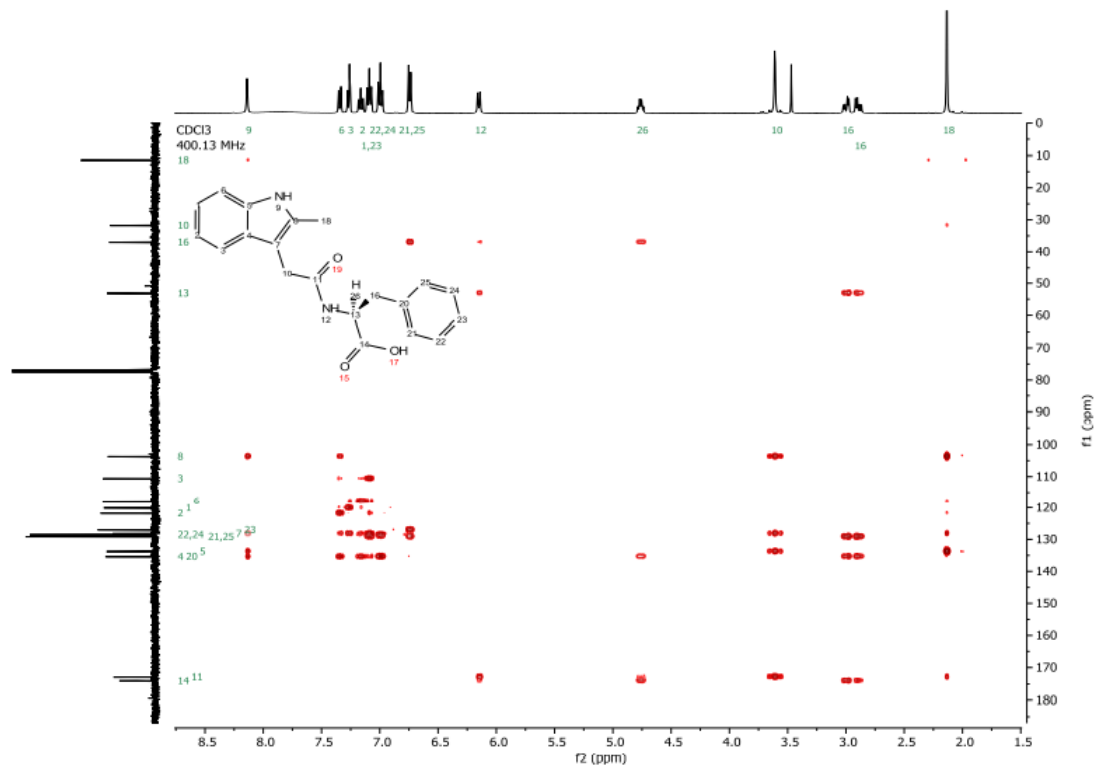

**Chemical Structure of Compound 14:** CC1=C(C(=O)N1C2=CC=CC=C2)C(=O)N1C2=CC=CC=C2

**<sup>1</sup>H NMR Spectrum (CDCl<sub>3</sub>):**

| Chemical Shift (ppm) | Multiplicity | Integration |
|----------------------|--------------|-------------|
| 9.81                 | s            | 1.00        |
| 7.89                 | s            | 1.00        |
| 7.33                 | m            | 3.00        |
| 7.11                 | m            | 1.00        |
| 6.74                 | m            | 1.00        |
| 5.99                 | s            | 1.00        |
| 4.69                 | s            | 1.00        |
| 3.64                 | s            | 1.00        |
| 3.04                 | dd           | 1.00        |
| 2.95                 | dd           | 1.00        |
| 2.20                 | s            | 1.00        |

### <sup>1</sup>H NMR Spectra of acid **4c**

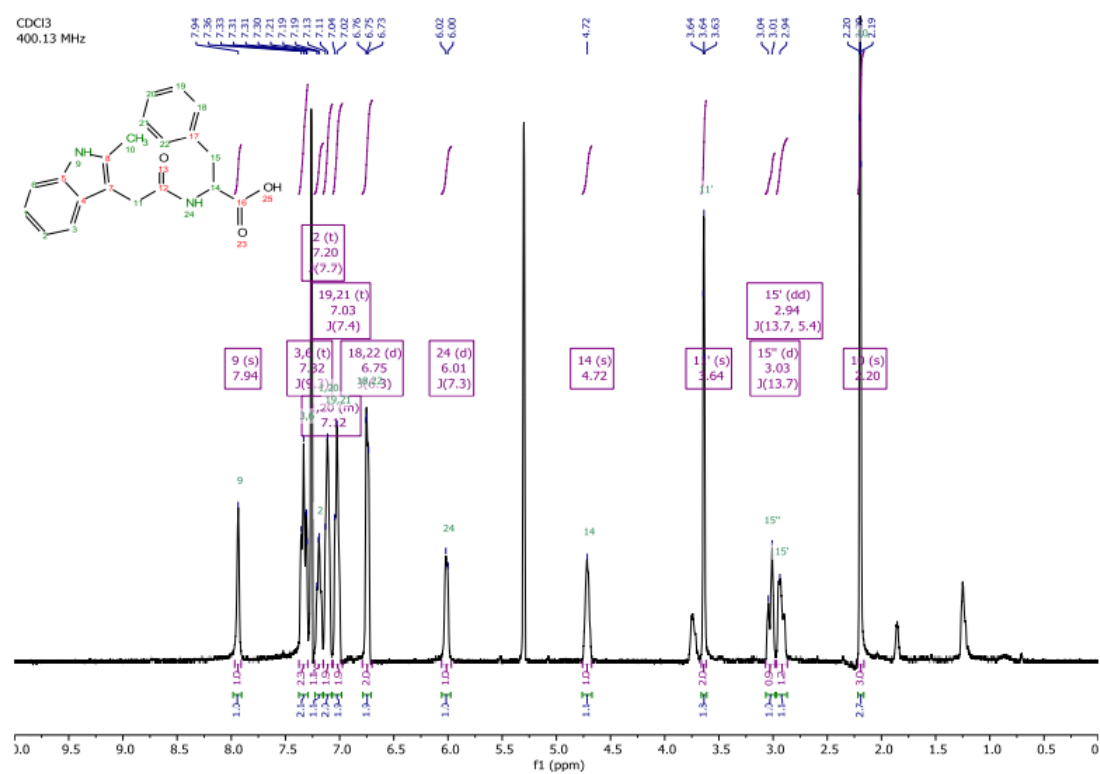

# <sup>1</sup>H NMR Spectra of natural PF74 **5a**

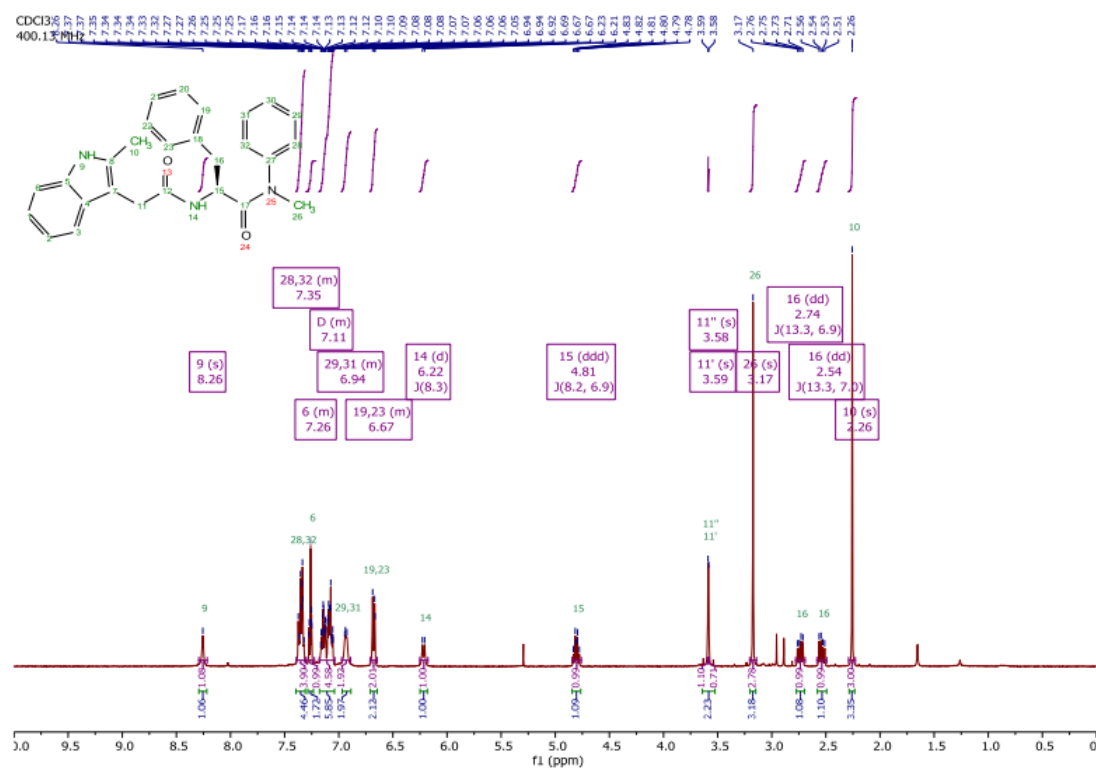

# <sup>13</sup>C NMR Spectra of natural PF74 **5a**

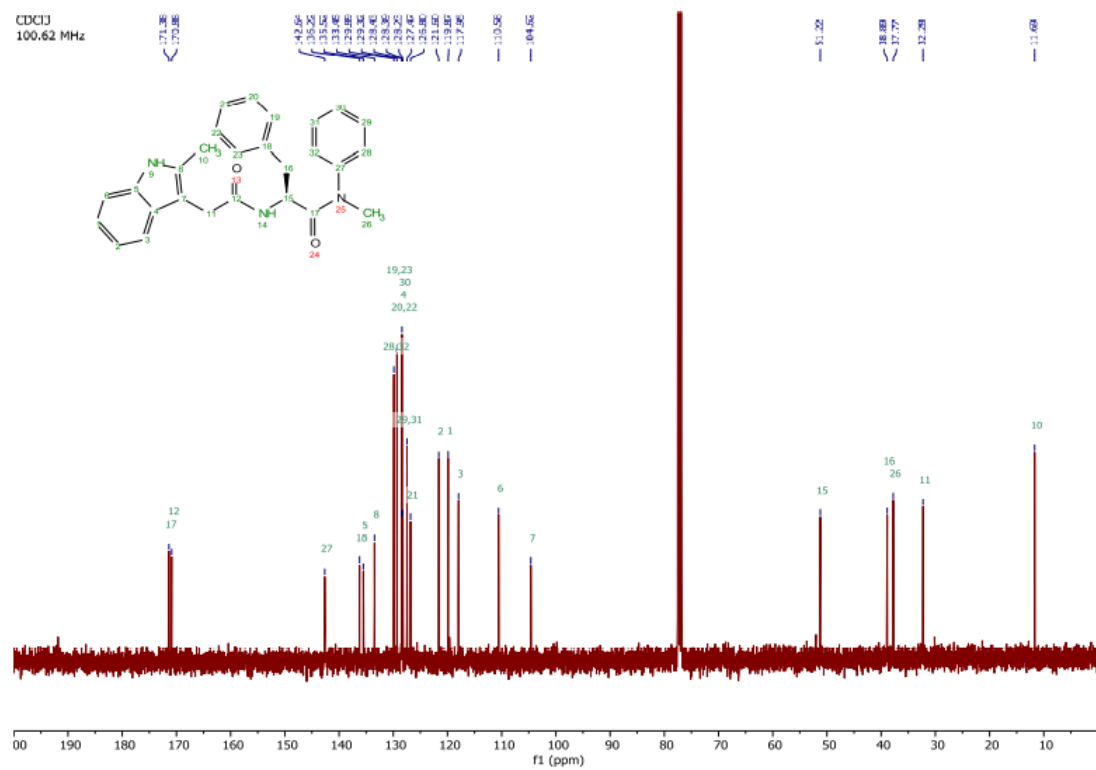

## COSY Spectra of natural PF74 **5a**

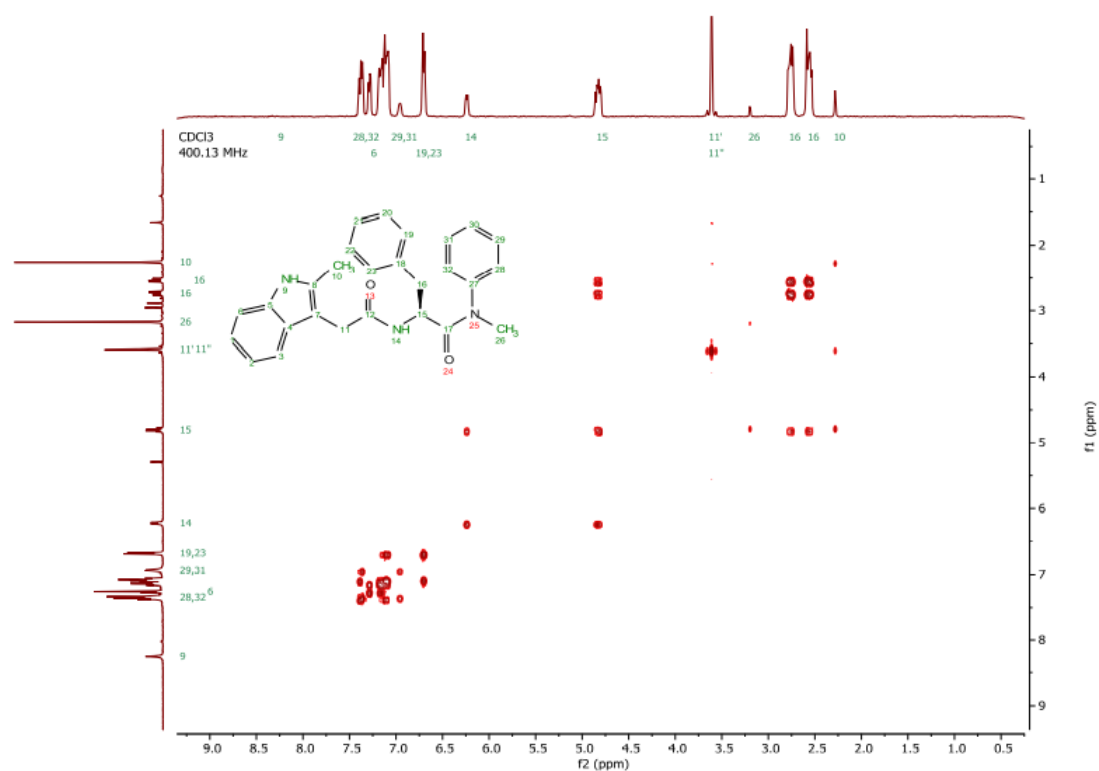

## HSQC Spectra of natural PF74 **5a**

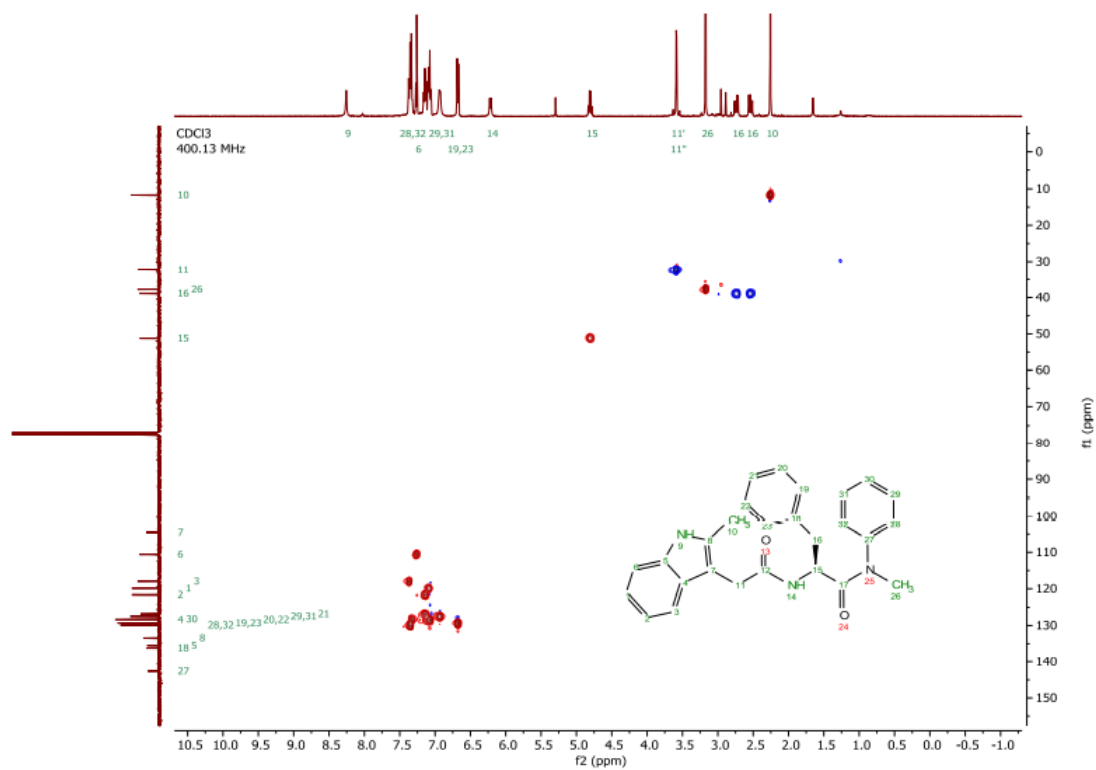

## HMBC Spectra of natural PF74 **5a**

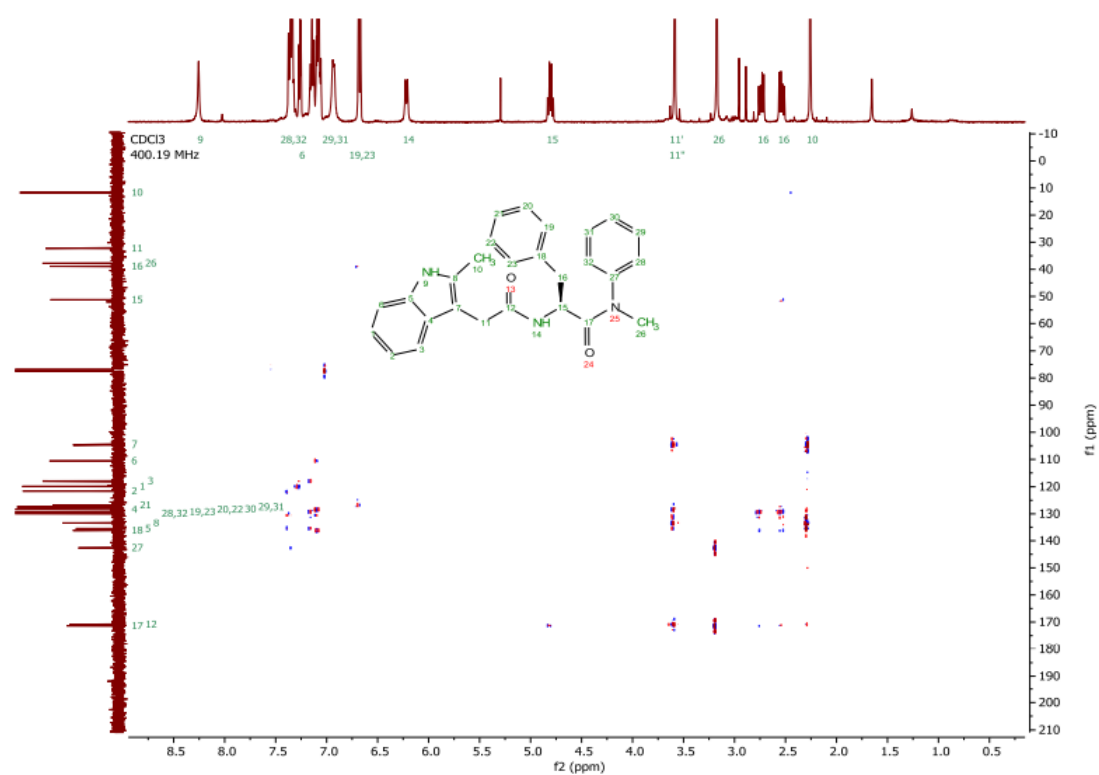

# <sup>1</sup>H NMR Spectra of unnatural PF74 **5b**

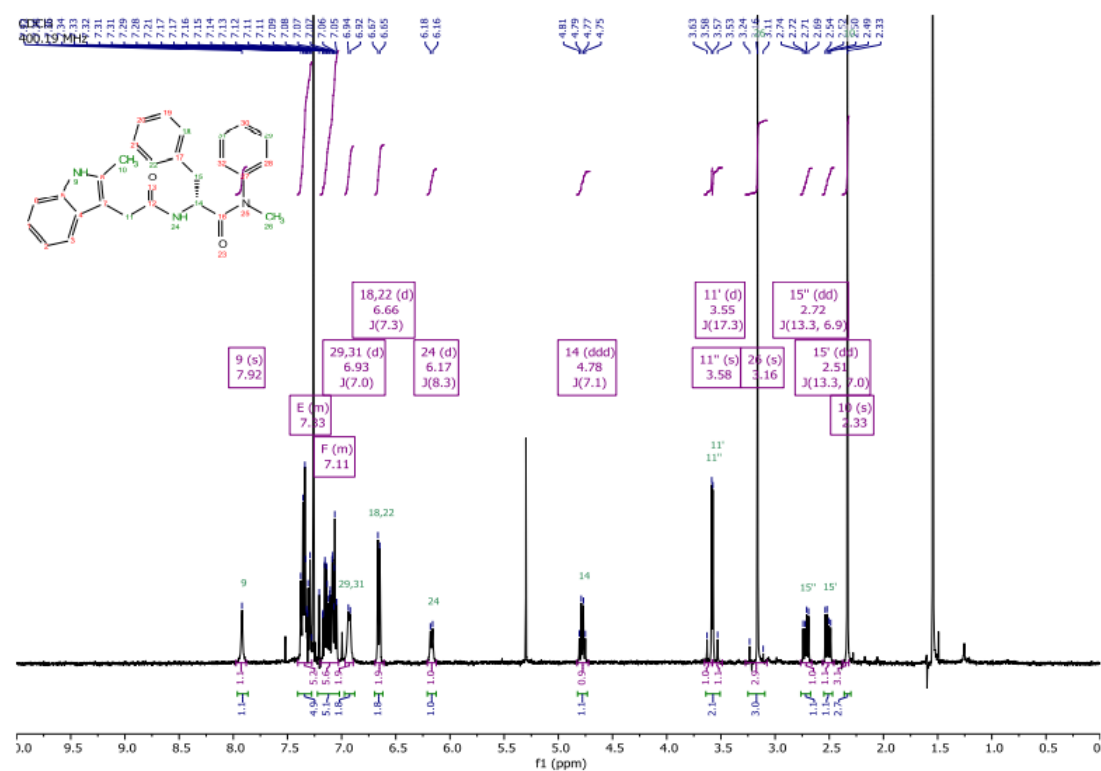

# <sup>1</sup>H NMR Spectra of racemic PF74 **5c**

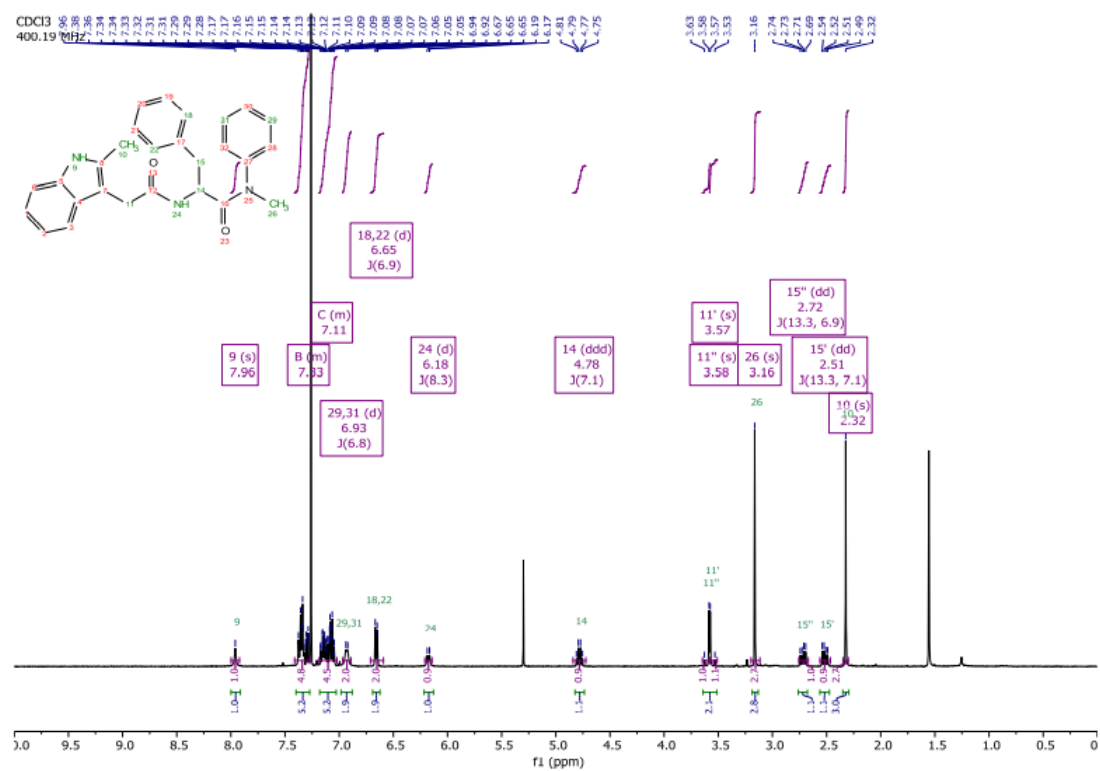

Supplement: s1 [file s1]
